# Supplementary material for: Heterogeneous approach to nebulization of antimicrobial agents in mechanically ventilated adults in a German tertiary care hospital: a cross-sectional survey
Source: Springer Nature journal article supplement (doi:10.1007/s10096-020-04017-0), 2020-09-03
Supplement: MOESM1 [file 18345232]

1. Name of the respondent:
2. E-Mail of the respondent:
3. Name of the unit:
4. Specialty of ICU (e.g. surgical, internal medicine, neurological)

|                                                                                        |                              |                             |                                    |                            |                              |                                                                               |                                     |                                          |                          |                                            |                               |                                           |                                             |  |                                                                    |  |                                               |  |
|----------------------------------------------------------------------------------------|------------------------------|-----------------------------|------------------------------------|----------------------------|------------------------------|-------------------------------------------------------------------------------|-------------------------------------|------------------------------------------|--------------------------|--------------------------------------------|-------------------------------|-------------------------------------------|---------------------------------------------|--|--------------------------------------------------------------------|--|-----------------------------------------------|--|
| 5. Which device is used for inhalation ?                                               |                              |                             |                                    |                            |                              |                                                                               |                                     |                                          |                          |                                            |                               |                                           |                                             |  |                                                                    |  |                                               |  |
| ultrasonic nebulizer                                                                   | jet nebulizer                | vibrating-mesh<br>nebulizer | other<br>(please specify)          |                            |                              |                                                                               |                                     |                                          |                          |                                            |                               |                                           |                                             |  |                                                                    |  |                                               |  |
| <input type="checkbox"/>                                                               | <input type="checkbox"/>     | <input type="checkbox"/>    | <input type="checkbox"/>           |                            |                              |                                                                               |                                     |                                          |                          |                                            |                               |                                           |                                             |  |                                                                    |  |                                               |  |
| 6. Is there a protocol available for administration of nebulized anti-infectives ?     |                              |                             |                                    |                            |                              |                                                                               |                                     |                                          |                          |                                            |                               |                                           |                                             |  |                                                                    |  |                                               |  |
| yes                                                                                    |                              |                             |                                    |                            | no                           |                                                                               |                                     |                                          |                          |                                            |                               |                                           |                                             |  |                                                                    |  |                                               |  |
| <input type="checkbox"/>                                                               |                              |                             |                                    |                            | <input type="checkbox"/>     |                                                                               |                                     |                                          |                          |                                            |                               |                                           |                                             |  |                                                                    |  |                                               |  |
| 7. Do you make use of bronchodilators before nebulized anti-infectives ?               |                              |                             |                                    |                            |                              |                                                                               |                                     |                                          |                          |                                            |                               |                                           |                                             |  |                                                                    |  |                                               |  |
| always                                                                                 |                              |                             | sometimes                          |                            |                              | never                                                                         |                                     |                                          |                          |                                            |                               |                                           |                                             |  |                                                                    |  |                                               |  |
| <input type="checkbox"/>                                                               |                              |                             | <input type="checkbox"/>           |                            |                              | <input type="checkbox"/>                                                      |                                     |                                          |                          |                                            |                               |                                           |                                             |  |                                                                    |  |                                               |  |
| 8. How frequently do you change the filter on the expiratory limb ?                    |                              |                             |                                    |                            |                              |                                                                               |                                     |                                          |                          |                                            |                               |                                           |                                             |  |                                                                    |  |                                               |  |
| after every nebulization                                                               |                              | every day                   |                                    | twice a week               |                              | once a week                                                                   |                                     | if necessary                             |                          |                                            |                               |                                           |                                             |  |                                                                    |  |                                               |  |
| <input type="checkbox"/>                                                               |                              | <input type="checkbox"/>    |                                    | <input type="checkbox"/>   |                              | <input type="checkbox"/>                                                      |                                     | <input type="checkbox"/>                 |                          |                                            |                               |                                           |                                             |  |                                                                    |  |                                               |  |
| 9. Do you change the respirator setting when administering nebulized anti-infectives ? |                              |                             |                                    |                            |                              |                                                                               |                                     |                                          |                          |                                            |                               |                                           |                                             |  |                                                                    |  |                                               |  |
| yes                                                                                    |                              |                             |                                    |                            | no                           |                                                                               |                                     |                                          |                          |                                            |                               |                                           |                                             |  |                                                                    |  |                                               |  |
| <input type="checkbox"/>                                                               |                              |                             |                                    |                            | <input type="checkbox"/>     |                                                                               |                                     |                                          |                          |                                            |                               |                                           |                                             |  |                                                                    |  |                                               |  |
| 10. If so, which respirator settings are changed ?                                     |                              |                             |                                    |                            |                              |                                                                               |                                     |                                          |                          |                                            |                               |                                           |                                             |  |                                                                    |  |                                               |  |
| increase PEEP                                                                          | decrease inspiratory<br>flow |                             | use a constant<br>inspiratory flow |                            | increase inspiratory<br>time |                                                                               | insert an end-<br>inspiratory pause |                                          | increase tidal<br>volume |                                            | stop the active<br>humidifier |                                           | place a filter on<br>the expiratory<br>limb |  | use sedation to<br>avoid<br>discoordination<br>with the ventilator |  | use continuous<br>flow or breath<br>actuation |  |
| <input type="checkbox"/>                                                               | <input type="checkbox"/>     |                             | <input type="checkbox"/>           |                            | <input type="checkbox"/>     |                                                                               | <input type="checkbox"/>            |                                          | <input type="checkbox"/> |                                            | <input type="checkbox"/>      |                                           | <input type="checkbox"/>                    |  | <input type="checkbox"/>                                           |  | <input type="checkbox"/>                      |  |
| 11. Do you use nebulized anti-infectives for patients with ARDS and NO ventilation ?   |                              |                             |                                    |                            |                              |                                                                               |                                     |                                          |                          |                                            |                               |                                           |                                             |  |                                                                    |  |                                               |  |
| yes                                                                                    |                              |                             |                                    |                            | no                           |                                                                               |                                     |                                          |                          |                                            |                               |                                           |                                             |  |                                                                    |  |                                               |  |
| <input type="checkbox"/>                                                               |                              |                             |                                    |                            | <input type="checkbox"/>     |                                                                               |                                     |                                          |                          |                                            |                               |                                           |                                             |  |                                                                    |  |                                               |  |
| 12. Do you use nebulized anti-infectives for patients with ECMO support ?              |                              |                             |                                    |                            |                              |                                                                               |                                     |                                          |                          |                                            |                               |                                           |                                             |  |                                                                    |  |                                               |  |
| yes                                                                                    |                              |                             |                                    |                            | no                           |                                                                               |                                     |                                          |                          |                                            |                               |                                           |                                             |  |                                                                    |  |                                               |  |
| <input type="checkbox"/>                                                               |                              |                             |                                    |                            | <input type="checkbox"/>     |                                                                               |                                     |                                          |                          |                                            |                               |                                           |                                             |  |                                                                    |  |                                               |  |
| 13. Do you make use of intravenous formulations as nebulized anti-infectives ?         |                              |                             |                                    |                            |                              |                                                                               |                                     |                                          |                          |                                            |                               |                                           |                                             |  |                                                                    |  |                                               |  |
| yes                                                                                    |                              |                             |                                    |                            | no                           |                                                                               |                                     |                                          |                          |                                            |                               |                                           |                                             |  |                                                                    |  |                                               |  |
| <input type="checkbox"/>                                                               |                              |                             |                                    |                            | <input type="checkbox"/>     |                                                                               |                                     |                                          |                          |                                            |                               |                                           |                                             |  |                                                                    |  |                                               |  |
| 14. For what indication(s) do you prescribe nebulized anti-infective therapy ?         |                              |                             |                                    |                            |                              |                                                                               |                                     |                                          |                          |                                            |                               |                                           |                                             |  |                                                                    |  |                                               |  |
| VAP                                                                                    |                              | VAT                         |                                    | prevention of<br>VAT / VAP |                              | only for VAT / VAP<br>due to MDR<br>(possibly additional<br>systemic therapy) |                                     | respiratory tract<br>colonization by MDR |                          | prevention of<br>invasive<br>aspergillosis |                               | treatment of<br>invasive<br>aspergillosis |                                             |  |                                                                    |  |                                               |  |
| <input type="checkbox"/>                                                               |                              | <input type="checkbox"/>    |                                    | <input type="checkbox"/>   |                              | <input type="checkbox"/>                                                      |                                     | <input type="checkbox"/>                 |                          | <input type="checkbox"/>                   |                               | <input type="checkbox"/>                  |                                             |  |                                                                    |  |                                               |  |

|                                                                                                                   |                                                    |                                                             |                                                                   |                                                    |                                                                   |
|-------------------------------------------------------------------------------------------------------------------|----------------------------------------------------|-------------------------------------------------------------|-------------------------------------------------------------------|----------------------------------------------------|-------------------------------------------------------------------|
| 15. Which nebulized anti-infectives do you administer for patients with VAT (with dosage) ?                       |                                                    |                                                             |                                                                   |                                                    |                                                                   |
| 16. Do you use systemic anti-infectives as adjunctive therapy in VAT ?                                            |                                                    |                                                             |                                                                   |                                                    |                                                                   |
| yes<br><input type="checkbox"/>                                                                                   | no<br><input type="checkbox"/>                     |                                                             |                                                                   |                                                    |                                                                   |
| 17. Which nebulized anti-infectives do you administer for patients with VAP (with dosage) ?                       |                                                    |                                                             |                                                                   |                                                    |                                                                   |
| 18. Do you use systemic anti-infectives as adjunctive therapy in VAP ?                                            |                                                    |                                                             |                                                                   |                                                    |                                                                   |
| yes<br><input type="checkbox"/>                                                                                   | no<br><input type="checkbox"/>                     |                                                             |                                                                   |                                                    |                                                                   |
| 19. Which nebulized anti-infectives are used in prophylaxis of VAT and VAP (with dosage) ?                        |                                                    |                                                             |                                                                   |                                                    |                                                                   |
| 20. Which is your primary objective when administering nebulized anti-infectives ?                                |                                                    |                                                             |                                                                   |                                                    |                                                                   |
| improve survival<br><input type="checkbox"/>                                                                      | prevent adverse events<br><input type="checkbox"/> | prevent emergence of resistance<br><input type="checkbox"/> | reduce days on mechanical ventilation<br><input type="checkbox"/> | treatment of hypoxemia<br><input type="checkbox"/> | prophylaxis of respiratory infections<br><input type="checkbox"/> |
| 21. What is the subjectively perceived effectiveness of the nebulized anti-infectives to achieve this objective ? |                                                    |                                                             |                                                                   |                                                    |                                                                   |
| very strong<br><input type="checkbox"/>                                                                           | strong<br><input type="checkbox"/>                 | weak<br><input type="checkbox"/>                            | very weak<br><input type="checkbox"/>                             |                                                    |                                                                   |
| 22. What is the subjectively perceived safety of nebulized anti-infectives ?                                      |                                                    |                                                             |                                                                   |                                                    |                                                                   |
| very safe<br><input type="checkbox"/>                                                                             | safe<br><input type="checkbox"/>                   | unsafe<br><input type="checkbox"/>                          | very unsafe<br><input type="checkbox"/>                           |                                                    |                                                                   |

|                |                                         |
|----------------|-----------------------------------------|
| Abbreviations: |                                         |
| ARDS           | acute respiratory distress syndrome     |
| ECMO           | extracorporeal membrane oxygenation     |
| ICU            | intensive care unit                     |
| MDR            | multidrug-resistant pathogens           |
| NO             | nitric oxide                            |
| PEEP           | positive end-expiratory pressure        |
| VAP            | ventilator-associated pneumonia         |
| VAT            | ventilator-associated tracheobronchitis |
